# Supplementary material for: Functional genetic validation of key genes conferring insecticide resistance in the major African malaria vector, Anopheles gambiae
Source: PubMed Central journal article supplement — Proc Natl Acad Sci U S A. 2019 Dec 4;116(51):25764–72. doi: 10.1073/pnas.1914633116 (PMC6926047; doi:10.1073/pnas.1914633116), 2019-12-04
Supplement: pnas.1914633116.sapp.pdf [file pnas.1914633116.sapp.pdf]

Supplementary Information for

**Functional genetic validation of key genes conferring insecticide resistance in the major African malaria vector, *Anopheles gambiae***

**Adriana Adolfi, Beth Poulton, Amalia Anthousi, Stephanie Macilwee, Hilary Ranson, and Gareth J Lycett**

Corresponding author:

Gareth J Lycett

[Gareth.Lycett@lstmed.ac.uk](mailto:Gareth.Lycett@lstmed.ac.uk)

**This PDF file includes:**

**Supplementary method:** *Cyp6* expression analysis using the  $\Delta\Delta\text{Ct}$  method

**Figure S1.** Orientation of insertion of the UAS transgenic cassette in representative individuals of responder lines

**Figure S2.** Multi-tissue overexpression of GSTE2 in the integration line affects sensitivity to the organochlorine insecticide DDT

**Figure S3.** Tissue-specific *Cyp6* gene upregulation does not affect sensitivity to insecticides (reduced exposure)

**Figure S4.** Tissue-specific *Cyp6* gene upregulation does not affect sensitivity to the organophosphate insecticide malathion (reduced exposure)

**Table S1.** Primers used in this study

**Table S2.** Bioassay experiments

## Supplementary method

### **Cyp6 expression analysis using the $\Delta\Delta Ct$ method**

Threshold cycle (Ct) values were corrected for primer efficiency applying the formula *Corrected Ct* =  $Ct (\text{Log}x / \text{Log}2)$ , where  $x = 2$  if efficiency is >100% and  $x = 1 + \text{Efficiency}$  if efficiency is <100%.

Ct values obtained for target genes were normalised against those of the housekeeping genes RPS7 and Ubiquitin using the formula  $\Delta Ct = Ct_{\text{target}} - Ct_{\text{housekeeping}}$ .

Mean  $\Delta Ct$  values of GAL4/+ mosquitoes were then compared to those of GAL4/UAS mosquitoes using the formula  $\Delta\Delta Ct = \Delta Ct_{\text{GAL4/+}} - \Delta Ct_{\text{GAL4/UAS}}$ . Fold change (FC, x) expression between the two populations was calculated with the formula  $FC = (2^{\Delta\Delta Ct_{\text{GAL4/UAS}}}) / (2^{\Delta\Delta Ct_{\text{GAL4/+}}})$ .

Statistical differences in fold change expression between GAL4/UAS and GAL4/+ were determined using t test (unpaired, two-tails, assuming equal variance) in GraphPad Prism version 8.2.1 (GraphPad Software, La Jolla California USA, [www.graphpad.com](http://www.graphpad.com)).

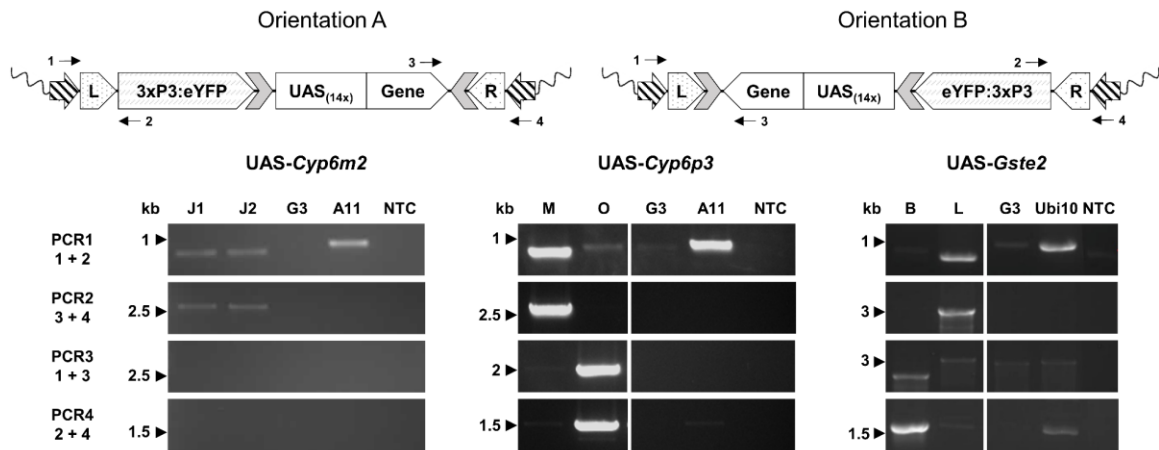

**Figure S1. Orientation of insertion of the UAS transgenic cassette in representative individuals of responder lines.** Two orientations of insertion, A and B, are possible after recombination of the *attP* sites in the docking mosquito genome and the *attB* sites in the UAS plasmids. Striped arrows: piggyBac transposon arms; 3xP3: eye and nerve-cord specific promoter; eYFP: enhanced yellow fluorescent protein; grey arrows: Gypsy insulators; UAS<sub>(14x)</sub>: upstream activating sequence (14 repeats). Each PCR (1-4) gives a distinct amplification fragment that is diagnostic for the orientation of the insertion. →: primer annealing site. 1: PiggyBacR-R2, 2: Red-seq4R, 3: M2intFW or P3intFW or GSTe2\_v1/v2, 4: ITRL1R. L, R: attL and attR hybrid sites created after recombination. J1, J2: individuals from the UAS-Cyp6m2 line; M, O: representative individuals from the UAS-Cyp6p3 line; B, L: representative individuals from the UAS-Gste2 line; G3: wild type; A11: docking line control; Ubi10: docking line control; NTC: negative control (water as template).

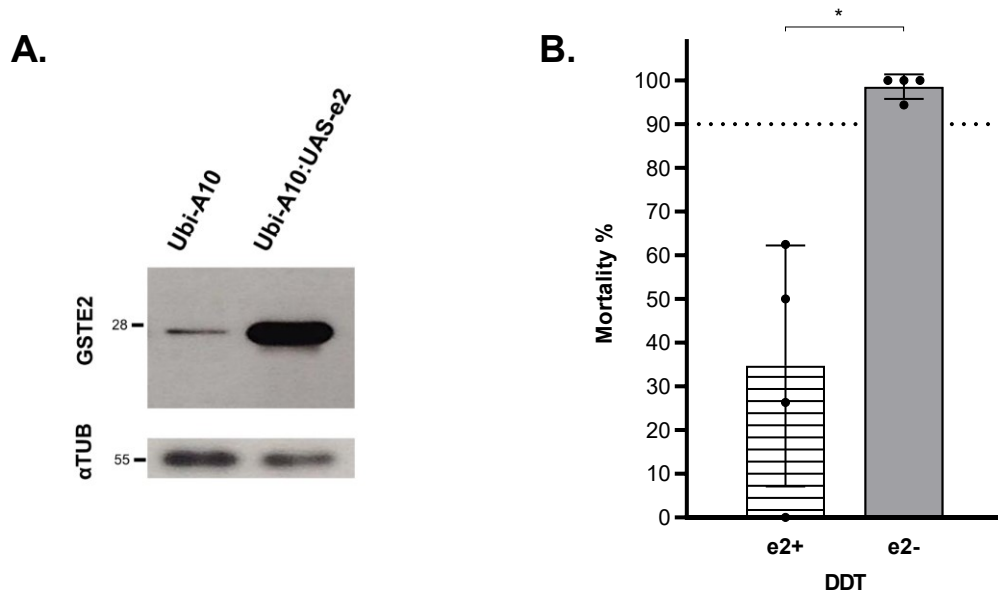

**Figure S2. Multi-tissue overexpression of GSTE2 in the integration line affects sensitivity to the organochlorine insecticide DDT.** **A)** Expression of GSTE2 and  $\alpha$ -tubulin in adult females of the Ubi-A10:UAS-e2 line with respective Ubi-A10/+ controls. Protein extract from the equivalent of 1/10 of a whole female mosquito was loaded in each lane. **B)** Sensitivity to DDT of Ubi-A10:UAS-e2 females overexpressing *Gste2* (e2+) ubiquitously under the control of the Ubi-A10 driver compared to negative sibling controls (e2-) was measured by WHO tube bioassay. Bars represent SD (N = 4, Table S2). Dotted line marks the WHO 90% mortality threshold for defining resistance. Welch's t test with  $P < 0.05$  significance cut off.

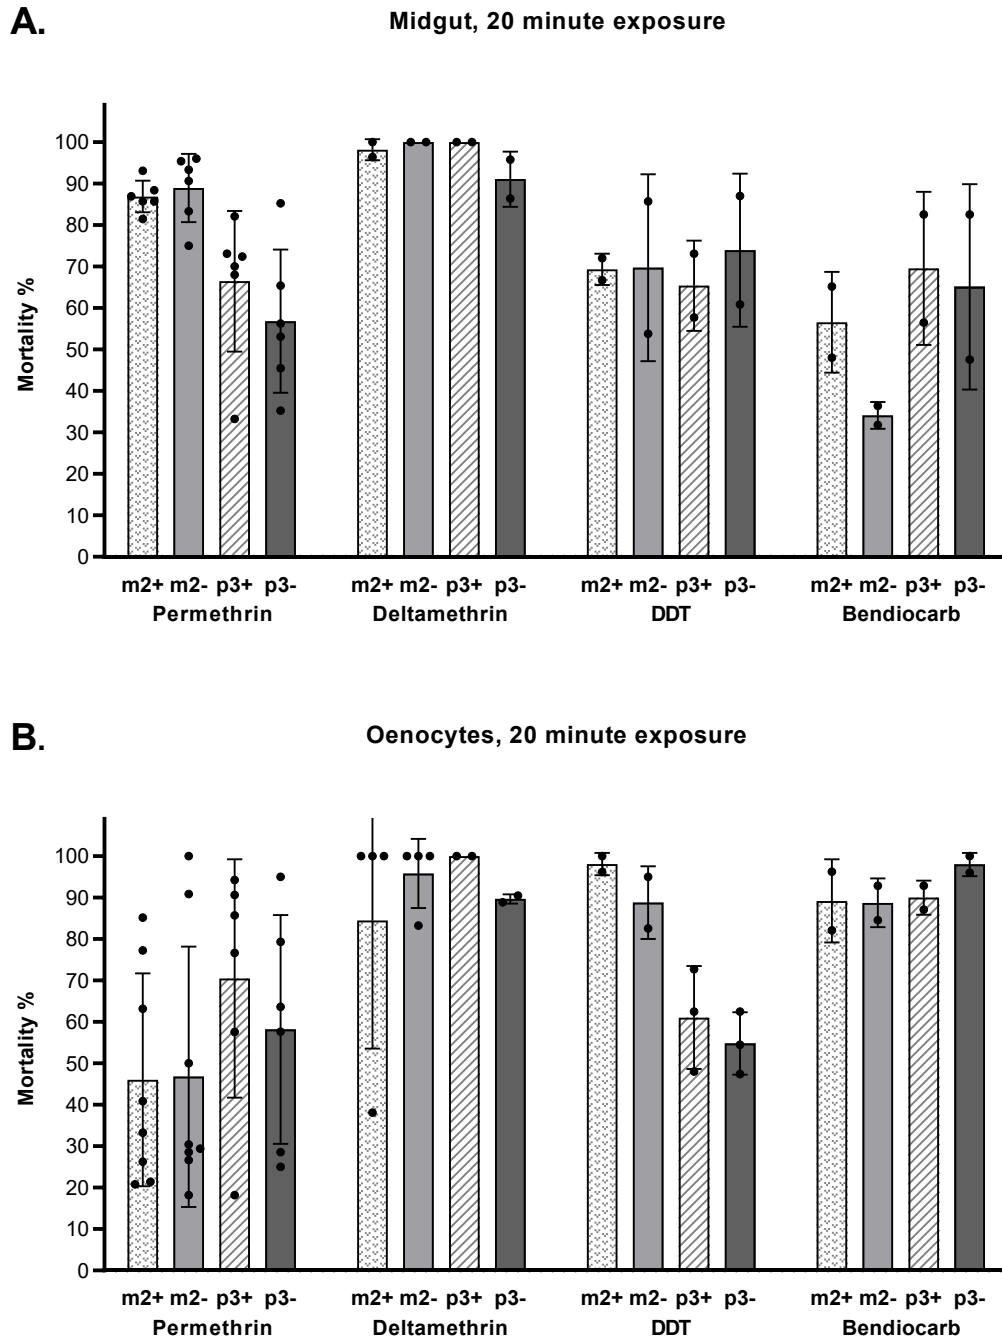

**Figure S3. Tissue-specific *Cyp6* gene upregulation does not affect sensitivity to insecticides (reduced exposure).** Sensitivity to insecticides of GAL4/UAS (+) females overexpressing *Cyp6m2* or *Cyp6p3* under the control of the midgut (A) or oenocyte specific (B) drivers compared to GAL4/+ controls (-) measured by a modified WHO tube bioassay representing mortality rates after 20 minutes of exposure and 24 h recovery. Bars represent SD (N = 2-8, Table S2). Welch's t test with  $P < 0.01$  significance cut off.

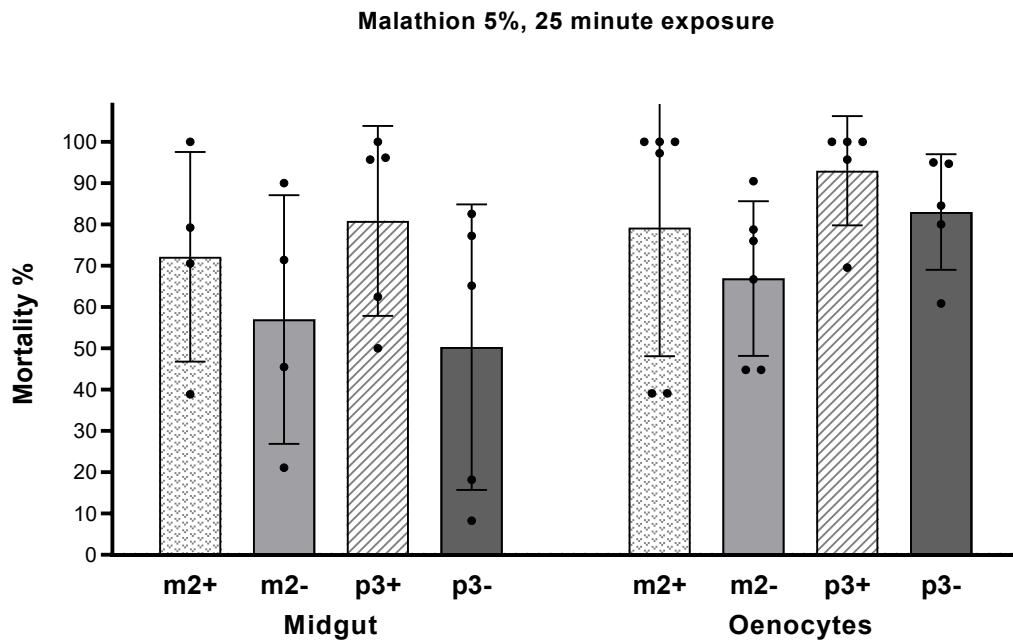

**Figure S4. Tissue-specific *Cyp6* gene upregulation does not affect sensitivity to the organophosphate insecticide malathion (reduced exposure).** Sensitivity to malathion (reduced exposure) of females overexpressing *Cyp6m2* (m2+) or *Cyp6p3* (p3+) tissue-specifically (midgut, oenocytes) compared to respective controls (m2-, p3-) measure by modified WHO tube bioassay representing mortality rates after 25 minutes of exposure and 24 h recovery. Bars represent SD (N = 4-6, Table S2). Welch's t test with  $P < 0.01$  significance cut off.

**Table S1. Primers used in this study**

| <b>Primer</b>       | <b>Sequence 5'-3'</b>                   |
|---------------------|-----------------------------------------|
| <b>M2fw</b>         | TTCTGATATCAAAAATGTTTAGCTTGTTGGATTCA     |
| <b>M2rv</b>         | TTCTCTCGAGCTAAATCTTATCCACCTTCAACCAC     |
| <b>P3fw1</b>        | TTCTGAATTCAACGATGGAGCTAATTAACGCGGTGCTGG |
| <b>P3rv1</b>        | GGTACAGCTCCTGATGGATGTCGGC               |
| <b>P3fw2</b>        | GCCGACATCCATCAGGAGCTGTACC               |
| <b>P3rv2</b>        | TTCTCTCGAGCTACAACCTTTCCACCTTCAAG        |
| <b>Gste2k1bfor</b>  | GGGGGAATTCGAAAATGTCCAACCTTGTACTGTACAC   |
| <b>Gste2k1brev</b>  | GGGGCTCGAGTTAAGCCTTAGCATTCTCCTCCTT      |
| <b>PiggyBacR-R2</b> | TTTGCCTTTCGCCTTATTTTAGA                 |
| <b>Red-seq4R</b>    | CGAGGGTTCGAAATCGATAA                    |
| <b>M2intFW</b>      | CGTATAGGGCTGGCGTATCT                    |
| <b>P3intFW</b>      | GCTGAGAAAGTTCCGCTTCT                    |
| <b>GSTe2_v1</b>     | TGTAAATTCGGCCCTGCACT                    |
| <b>GSTe2_v2</b>     | GTGTAATTCGGCCCTGCAC                     |
| <b>ITRL1R</b>       | TGACGAGCTTGTTGGTGAGGATTCT               |
| <b>qM2fw</b>        | TACGATGACAACAAGGGCAAG                   |
| <b>qM2rv</b>        | GCGATCGTGGAAGTACTGG                     |
| <b>qP3fw</b>        | TGTGATTGACGAAACCCTTCGGAAG               |
| <b>qP3sub</b>       | ATAGTCCACAGATGGTACGCGGG                 |
| <b>qS7fw</b>        | AGAACCAGCAGACCACCATC                    |
| <b>qS7rv</b>        | GCTGCAAACCTTCGGCTATTC                   |
| <b>qUBfw</b>        | CGACTCCGTGGTGGTATCAT                    |
| <b>qUBrv</b>        | GCACTTGCGGCAAATCATCT                    |

**Table S2. Bioassay experiments**

|                         | Cross                  | Insecticide             | Standard exposure       |                 |         |      |     | Reduced exposure        |                 |         |      |     |
|-------------------------|------------------------|-------------------------|-------------------------|-----------------|---------|------|-----|-------------------------|-----------------|---------|------|-----|
|                         |                        |                         | Experiment (Biol. reps) | Tot. tech. reps | P       | t    | df  | Experiment (Biol. reps) | Tot. tech. reps | P       | t    | df  |
| UBIQUITOUS              | Ubi-A10<br>x<br>UAS-m2 | Permethrin 0.75%        | 2                       | 5               | 0.0007  | 7    | 5.3 | NS                      | NS              | NS      | NS   | NS  |
|                         |                        | Deltamethrin 0.05%      | 2                       | 4               | 0.04    | 3.5  | 3   | NS                      | NS              | NS      | NS   | NS  |
|                         |                        | DDT 4%                  | 1                       | 4               | N/A     | N/A  | N/A | NS                      | NS              | NS      | NS   | NS  |
|                         |                        | Bendiocarb 0.1%         | 1                       | 4               | N/A     | N/A  | N/A | NS                      | NS              | NS      | NS   | NS  |
|                         |                        | Malathion 5%            | NS                      | NS              | NS      | NS   | NS  | 2                       | 4               | <0.0001 | 14.5 | 4.3 |
|                         | Ubi-A10<br>x<br>UAS-p3 | Permethrin 0.75%        | 3                       | 5               | <0.0001 | 13.3 | 5.6 | NS                      | NS              | NS      | NS   | NS  |
|                         |                        | Deltamethrin 0.05%      | 1                       | 4               | 0.004   | 8.4  | 3   | NS                      | NS              | NS      | NS   | NS  |
|                         |                        | DDT 4%                  | 2                       | 6               | 0.7     | 0.3  | 9.1 | NS                      | NS              | NS      | NS   | NS  |
|                         |                        | Bendiocarb 0.1%         | 2                       | 6               | 0.0001  | 10.3 | 5   | NS                      | NS              | NS      | NS   | NS  |
|                         |                        | Malathion 5%            | NS                      | NS              | NS      | NS   | NS  | 2                       | 4               | 0.05    | 2.6  | 4.8 |
|                         | Ubi-A10<br>x<br>UAS-e2 | Permethrin 0.75%        | 1                       | 2               | 0.5     | 1    | 1   | NS                      | NS              | NS      | NS   | NS  |
|                         |                        | Deltamethrin 0.05%      | 1                       | 2               | N/A     | N/A  | N/A | NS                      | NS              | NS      | NS   | NS  |
|                         |                        | DDT 4%                  | 3                       | 6               | <0.0001 | 39.6 | 9.4 | NS                      | NS              | NS      | NS   | NS  |
|                         |                        | Bendiocarb 0.1%         | 1                       | 2               | 0.5     | 1    | 1   | NS                      | NS              | NS      | NS   | NS  |
|                         |                        | Malathion 5%            | 3                       | 6               | 0.1     | 2.   | 5   | NS                      | NS              | NS      | NS   | NS  |
|                         |                        | Fenitrothion 1%         | 2                       | 4               | <0.0001 | 35.2 | 5.9 | NS                      | NS              | NS      | NS   | NS  |
|                         | Ubi-A10:UAS-e2         | DDT 4%                  | 2                       | 4               | 0.0184  | 4.6  | 3   | NS                      | NS              | NS      | NS   | NS  |
|                         | MIDGUT                 | GAL4-mid<br>x<br>UAS-m2 | Permethrin 0.75%        | 1               | 2       | 0.35 | 1.3 | 1.4                     | 3               | 6       | 0.6  | 0.6 |
| Deltamethrin 0.05%      |                        |                         | 1                       | 2               | N/A     | N/A  | N/A | 1                       | 2               | 0.5     | 1    | 1   |
| DDT 4%                  |                        |                         | 2                       | 3               | 0.18    | 2    | 2   | 1                       | 2               | 0.98    | 0.02 | 1.1 |
| Bendiocarb 0.1%         |                        |                         | 1                       | 2               | N/A     | N/A  | N/A | 1                       | 2               | 0.2     | 2.5  | 1.1 |
| Malathion 5%            |                        |                         | NS                      | NS              | NS      | NS   | NS  | 2                       | 4               | 0.5     | 0.8  | 5.8 |
| GAL4-mid<br>x<br>UAS-p3 |                        | Permethrin 0.75%        | 1                       | 2               | >0.99   | 0    | 2   | 3                       | 6               | 0.35    | 0.98 | 10  |
|                         |                        | Deltamethrin 0.05%      | 1                       | 2               | N/A     | N/A  | N/A | 1                       | 2               | 0.3     | 1.9  | 1   |
|                         |                        | DDT 4%                  | 1                       | 2               | 0.9     | 0.1  | 1.9 | 1                       | 2               | 0.6     | 0.6  | 1.6 |
|                         |                        | Bendiocarb 0.1%         | 1                       | 2               | N/A     | N/A  | N/A | 1                       | 2               | 0.9     | 0.2  | 1.8 |
|                         |                        | Malathion 5%            | NS                      | NS              | NS      | NS   | NS  | 3                       | 5               | 0.1     | 1.6  | 7   |



|           |                          |                    |    |    |       |     |     |   |   |      |      |      |
|-----------|--------------------------|--------------------|----|----|-------|-----|-----|---|---|------|------|------|
| OENOCYTES | GAL4-oeno<br>x<br>UAS-m2 | Permethrin 0.75%   | 1  | 2  | N/A   | N/A | N/A | 4 | 8 | 0.96 | 0.05 | 13.5 |
|           |                          | Deltamethrin 0.05% | 1  | 2  | N/A   | N/A | N/A | 2 | 4 | 0.5  | 0.7  | 3.4  |
|           |                          | DDT 4%             | 1  | 2  | N/A   | N/A | N/A | 1 | 2 | 0.4  | 1.4  | 1.2  |
|           |                          | Bendiocarb 0.1%    | 1  | 2  | N/A   | N/A | N/A | 1 | 2 | 0.96 | 0.05 | 1.6  |
|           |                          | Malathion 5%       | NS | NS | NS    | NS  | NS  | 3 | 6 | 0.4  | 0.8  | 8.2  |
|           | GAL4-oeno<br>x<br>UAS-p3 | Permethrin 0.75%   | 1  | 2  | 0.013 | 49  | 1   | 3 | 6 | 0.5  | 0.8  | 10   |
|           |                          | Deltamethrin 0.05% | 1  | 2  | N/A   | N/A | N/A | 1 | 2 | 0.05 | 12.9 | 1    |
|           |                          | DDT 4%             | 1  | 2  | N/A   | N/A | N/A | 2 | 3 | 0.5  | 0.7  | 3.3  |
|           |                          | Bendiocarb 0.1%    | 1  | 2  | N/A   | N/A | N/A | 1 | 2 | 0.2  | 2.3  | 1.8  |
|           |                          | Malathion 5%       | NS | NS | NS    | NS  | NS  | 3 | 5 | 0.3  | 1.2  | 8    |

N/A: mortality is 100% in all replicates; NS: not screened.

Each experiment included mosquitoes deriving from independent crosses or from subsequent gonotrophic cycles of the same cross, therefore they were considered as biological replicates. 1-4 experiments were performed for each insecticide tested. Generally, two technical replicate tubes containing 20-25 females were tested for each population in each experiment. Standard exposure was 60 minutes for all insecticides except fenitrothion for which recommended exposure is 2 hours. Reduced exposure was 20 minutes for permethrin, deltamethrin, DDT and bendiocarb, and 25 minutes for malathion. Recovery time is 24 hours for all experiments.
